# Supplementary material for: A Rho-based reaction-diffusion system governs cell wall patterning in metaxylem vessels
Source: PubMed Central journal article supplement (PMC6070580; doi:10.1038/s41598-018-29543-y), 2018-08-01
Supplement: 41598_2018_29543_MOESM1_ESM.pdf [file 41598_2018_29543_MOESM1_ESM.pdf]

# **A Rho-based reaction-diffusion system governs cell wall patterning in metaxylem vessels**

Yoshinobu Nagashima, Satoru Tsugawa, Atsushi Mochizuki, Takema Sasaki,  
Hiroo Fukuda, Yoshihisa Oda

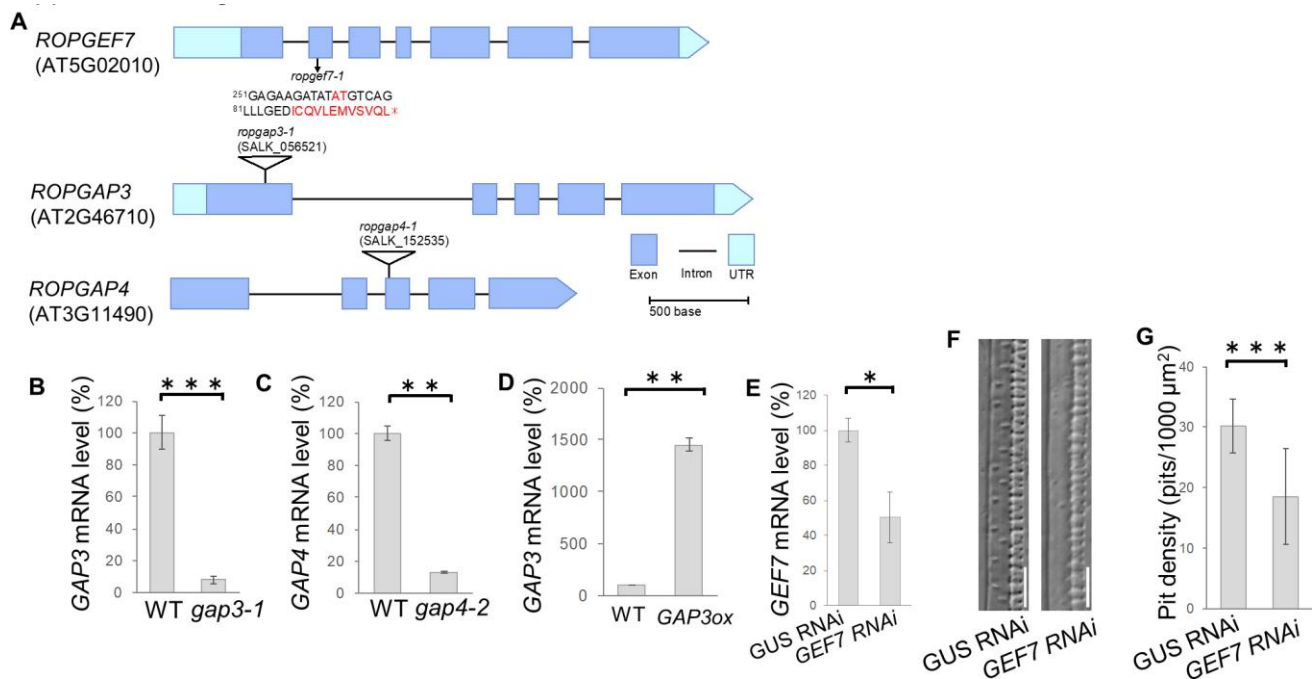

### Supplemental Figure S1. *ropgef* and *ropgap* mutants

(A) Structure of *ROPGEF7*(*GEF7*), *ROPGAP3*(*GAP3*) and *ROPGAP4*(*GAP4*). The *ropgef7-1* mutant contains an AT-insertion in the second exon. Red characters indicate the additional nucleotides and the amino acid sequence altered by frame shift.

(B and D) *ROPGAP3* mRNA levels in wild-type (WT) and *ropgap3-1* (B) or *ROPGAP3ox* (*GAP3ox*) (D) plants. Data are means  $\pm$  SD (n = 3); \*\*\**P* < 0.001; student's *t* test (B); \*\**P* < 0.01; Welch's *t* test (D).

(C) *ROPGAP4* mRNA levels in WT and *ropgap4-2* plants. Data are means  $\pm$  SD (n = 3). \*\**P* < 0.01; Welch's *t* test.

(E-G) *ROPGEF7* mRNA levels (E), DIC of xylem vessels (F), and density of secondary cell wall pits (G) in *GUS RNAi* and *GEF7 RNAi* plants. Data are means  $\pm$  SD (n = 3 (E) and 12(G)); \**P* < 0.05; \*\*\**P* < 0.001 student's *t* test; Scale bars = 10  $\mu$ m (F).

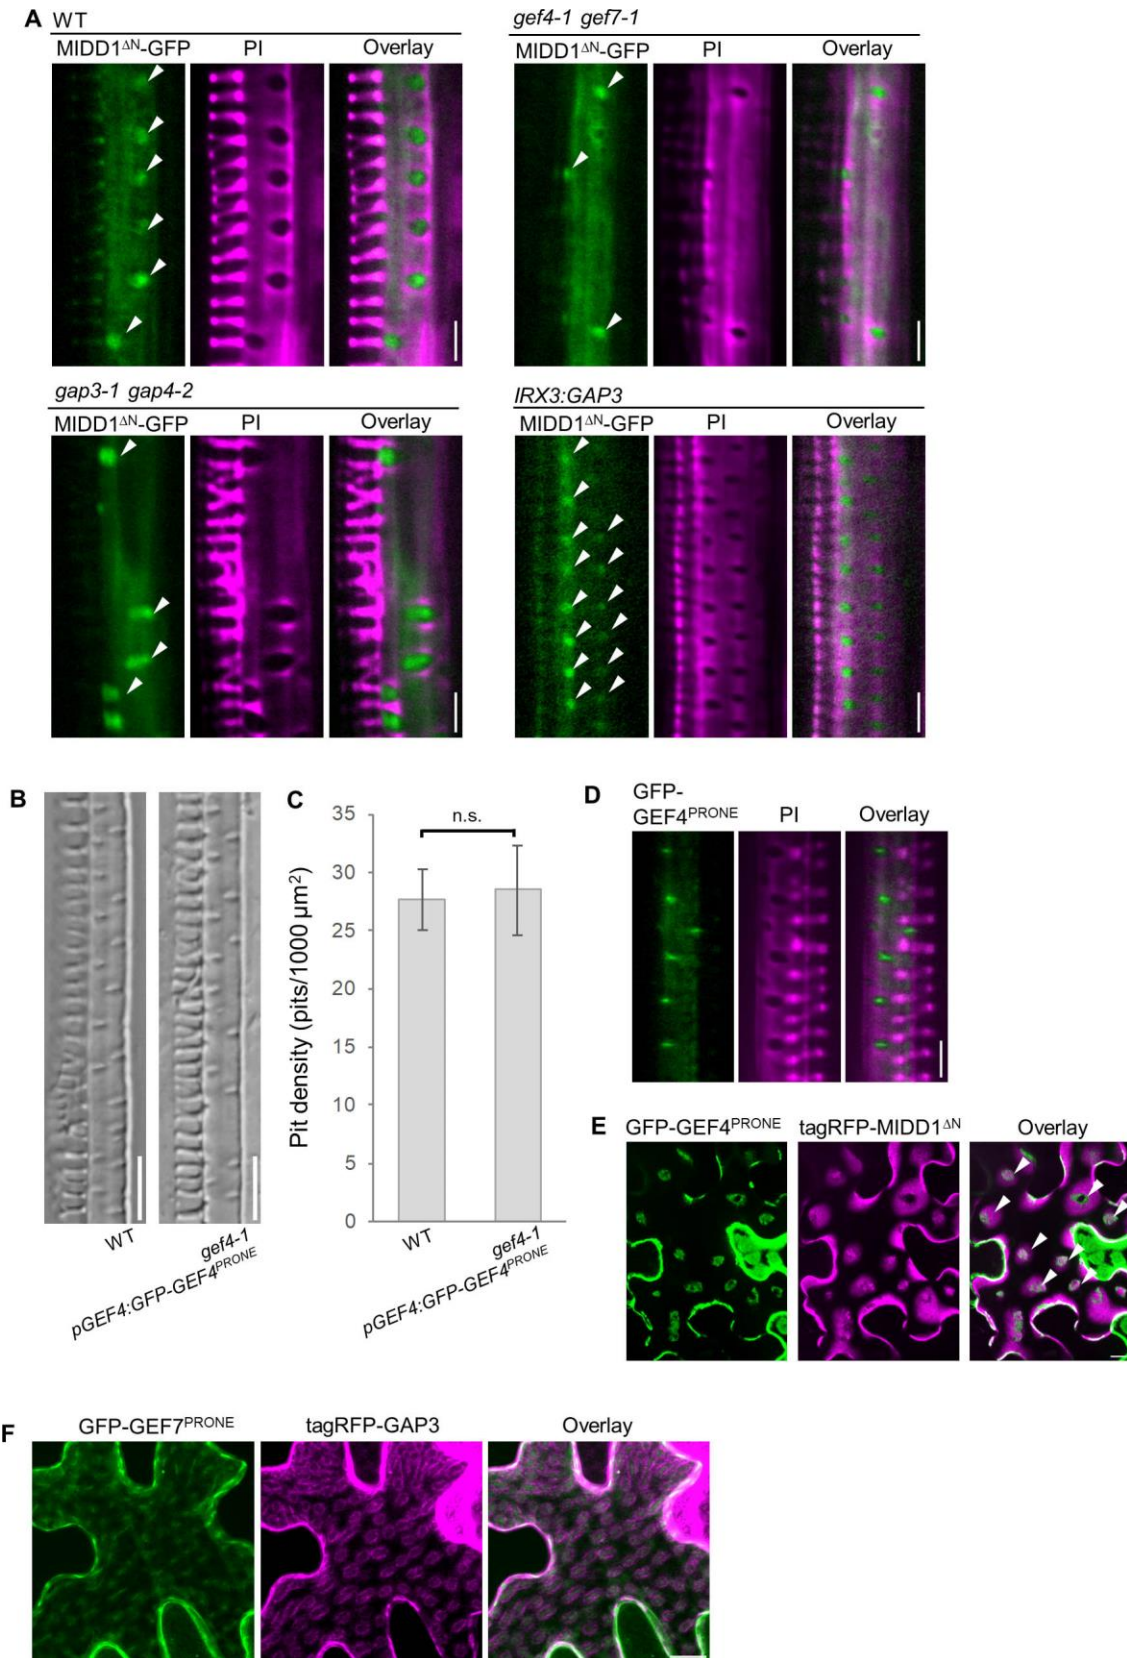

**Supplemental Figure S2. Visualization of ROP-activated domains.**

(A) Xylem vessel cells in the roots of wild type (WT), *ropgef4-1 ropgef7-1* (*gef4-1 gef7-1*), *ropgap3-1 ropgap4-2* (*gap3-1 gap4-2*), and *pIRX:ROPGAP3* (*IRX3:GAP3*) plants harbouring *pMIDD1:MIDD1<sup>ΔN</sup>-GFP*. ROP activated domains are labelled with *MIDD1<sup>ΔN</sup>-GFP* (arrowheads). Cell walls are stained with PI.

(B) DIC of metaxylem vessels in the roots of wild-type plants (WT) and *ropgef4-1 pROPGEF4:GFP-ROPGEF4<sup>PRONE</sup>* plants (*pGEF4:GFP-GEF4<sup>PRONE</sup>*).

(C) Density of secondary cell wall pits in WT and *ropgef4-1 pROPGEF4:GFP-ROPGEF4<sup>PRONE</sup>* plants. Data are means  $\pm$  SD (n = 12 plants). n.s. means not significant; student's *t* test.

(D) Localization of *GFP-ROPGEF4<sup>PRONE</sup>* in *ropgef4-1 pROPGEF4:GFP-ROPGEF4<sup>PRONE</sup>* plants. Cell walls are stained with propidium iodide (PI).

(E) Reconstruction of ROP-activated domains in tobacco leaf epidermal cells. *pLexA:GFP-ROPGEF4<sup>PRONE</sup>*, *pLexA:ROP11*, and *pLexA:ROPGAP3* were co-introduced to leaves of *N. benthamiana* along with *pLexA:tagRFP-MIDD1<sup>ΔN</sup>*, a marker for active ROP11. Arrowheads indicate ROP-activated domains marked with *tagRFP-MIDD1<sup>ΔN</sup>*, formed just around *ROPGEF4<sup>PRONE</sup>* domains.

(F) Reconstruction of *ROPGEF7<sup>PRONE</sup>* domains in tobacco leaf epidermal cells. *pLexA:GFP-ROPGEF7<sup>PRONE</sup>* was co-introduced to leaves of *N. benthamiana* along with *pLexA:ROP2* and *pLexA:tagRFP-ROPGAP3*.

Scale bars = 5  $\mu$ m (C and E) and 10  $\mu$ m (A, D, and F).

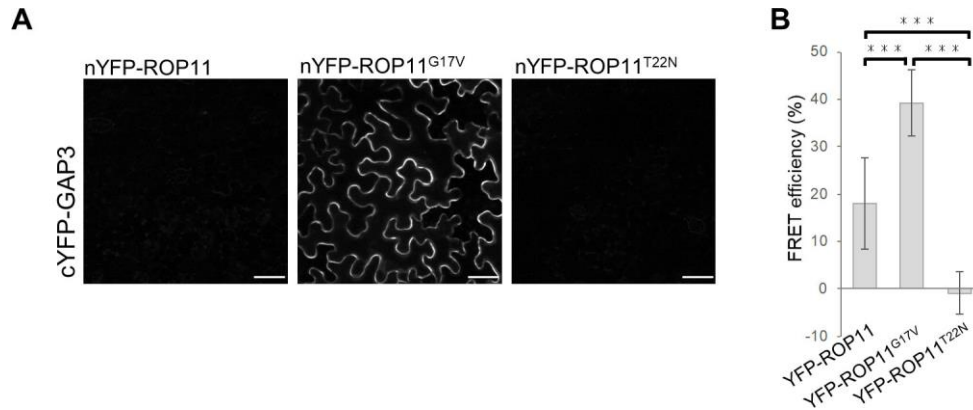

**Supplemental Figure S3. ROPGAP3 preferentially interacts with GTP-ROP11 in vivo**

(A) BiFC assay between cYFP-ROPGAP3 and nYFP-ROP11 derivatives. Note that YFP signal was detected only when cYFP-ROPGAP3 was co-expressed with YFP-ROP11<sup>G17V</sup>. Scale bars = 50  $\mu$ m.

(B) FRET efficiency between CFP-ROPGAP3 and YFP-ROP11 derivatives. Data are means  $\pm$  SD (n = 15). \*\*\* $P < 0.001$ ; ANOVA with Scheffe's test.

**Supplemental Table S1.** Turing instability can occur when the ODE is stable and PDE is unstable. S and PU indicate that the system is “always stable” or “possibly unstable”, respectively.

|                                          | ODE | PDE |
|------------------------------------------|-----|-----|
| (A) Closed-circuit model                 | S   | S   |
| (B) Inhibition from conserved quantities | S   | S   |
| (C) Positive feedback                    | PU  | PU  |

**Supplemental Movie S1.** An example of the pattern formation by the numerical simulation.
